# Supplementary material
Source: PubMed Central journal article supplement (PMC3558842)
Supplement: NIHMS421727-supplement-Supp_FigureS1.pdf [file NIHMS421727-supplement-Supp_FigureS1.pdf]

**SINV (TR339eGFP)**  
7 days post bloodmeal  
 $6.7 \times 10^6$  pfu/ml

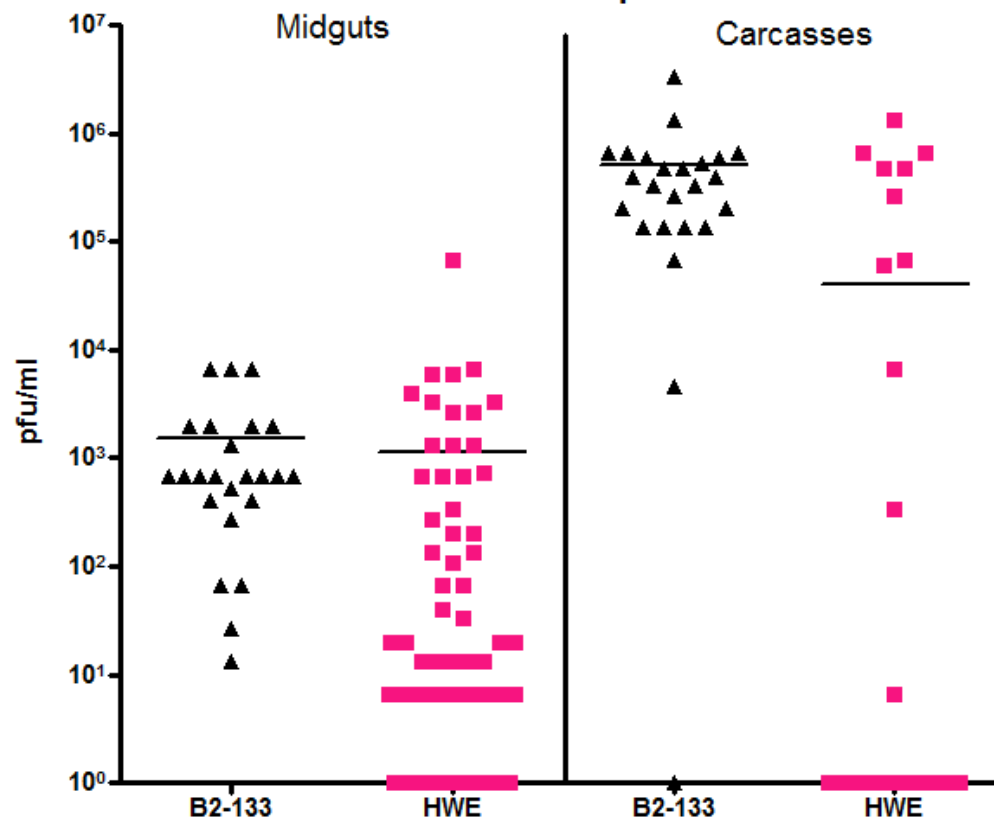

|                         |                                     |                                     |                                     |                                     |
|-------------------------|-------------------------------------|-------------------------------------|-------------------------------------|-------------------------------------|
| Total samples           | 24                                  | 98                                  | 24                                  | 98                                  |
| Number infected         | 24                                  | 47                                  | 23                                  | 11                                  |
| <b>Percent infected</b> | <b>100</b>                          | <b>48</b>                           | <b>96</b>                           | <b>11</b>                           |
| <b>P-value</b>          | <b>&lt; 0.0001</b>                  |                                     | <b>&lt; 0.0001</b>                  |                                     |
| <b>Mean titer</b>       | <b><math>1.5 \times 10^3</math></b> | <b><math>1.1 \times 10^3</math></b> | <b><math>5.0 \times 10^5</math></b> | <b><math>4.1 \times 10^4</math></b> |
| <b>P-value</b>          | <b>0.0096</b>                       |                                     | <b>0.0468</b>                       |                                     |
| Standard deviation      | $2.09 \times 10^3$                  | $6.81 \times 10^3$                  | $6.71 \times 10^5$                  | $1.76 \times 10^5$                  |
| Standard error          | $4.26 \times 10^2$                  | $6.88 \times 10^2$                  | $1.37 \times 10^5$                  | $1.78 \times 10^4$                  |

**Figure S1.** Intensity of SINV-TR339eGFP infection in Carb/B2-133 and HWE mosquitoes. Carb/B2-133 mosquitoes over-expressed FHV-B2 in midguts of bloodfed females from the *AeCPA-1* promoter. The transgenic line was unstable and was lost after this single challenge experiment. Females were orally challenged with SINV-TR339eGFP one-week post-eclosion. Each data point represents the virus titer (pfu/ml) in an individual midgut or carcass as analyzed by plaque assays at 7 days pbm. *P*-values ( $\alpha=0.05$ ) for infection rates and mean viral titers are shown in the table.
