# Supplementary material
Source: PubMed Central journal article supplement (PMC3558842)
Supplement: NIHMS421727-supplement-Supp_FigureS2.pdf [file NIHMS421727-supplement-Supp_FigureS2.pdf]

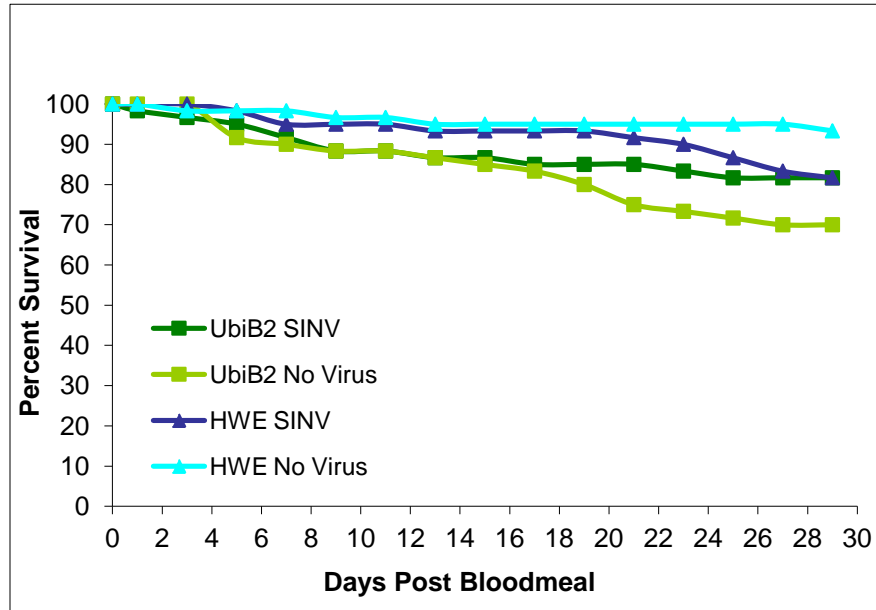

**Figure S2.** Survival curve of PUbB2 P61 and HWE control mosquitoes infected with SINV-TE3'2JeGFP. Seven days post-eclosion, PUbB2 P61 and HWE females were either fed with a non-infectious bloodmeal or with a bloodmeal containing SINV-TE3'2JeGFP (titer in the bloodmeal:  $2.7 \times 10^7$  pfu/ml). After bloodfeeding, 20 mosquitoes of each treatment were put into 470 ml cardboard containers and provided with sugar and water. For a period of 29 days after bloodfeeding the daily number of surviving mosquitoes in each container was recorded. Relative survival (average of three replicates per treatment) is shown.
